# Supplementary material for: Sequestosome 1 Is Part of the Interaction Network of VAPB
Source: MDPI journal article supplement (doi:10.3390/ijms222413271), 2021-12-09
Supplement: s1 [file s1]

**Table S4**  
**Antibodies**

| Name                                                | Species | Origin                                                                       | Application                                   | Dilution                 |
|-----------------------------------------------------|---------|------------------------------------------------------------------------------|-----------------------------------------------|--------------------------|
| <b>Primary antibodies</b>                           |         |                                                                              |                                               |                          |
| $\alpha$ -emerin                                    | rabbit  | #10351-1-AP, Proteintech                                                     | immunofluorescence                            | 1:200                    |
| $\alpha$ -GFP                                       | rat     | #3H9, ChromoTek                                                              | Western blotting                              | 1:1,000                  |
| $\alpha$ -laminA/C                                  | mouse   | # ab40567, Abcam                                                             | immunofluorescence                            | 1:100                    |
| $\alpha$ -VAPB                                      | rabbit  | #14477-1-AP, Proteintech                                                     | Western blotting<br>immunofluorescence        | 1:1,000<br>1:200         |
| $\alpha$ -VAPB                                      | mouse   | #66191-1-Ig, Proteintech                                                     | immunofluorescence<br>PLA                     | 1:200<br>1:100           |
| $\alpha$ -ACBD5                                     | rabbit  | #21080-1-AP, Proteintech                                                     | Western blotting<br>immunofluorescence        | 1:1,000<br>1:100         |
| $\alpha$ -OSBPL9                                    | rabbit  | #11879-1-AP, Proteintech                                                     | Western blotting<br>immunofluorescence        | 1:1,000<br>1:1           |
| $\alpha$ -TMEM43                                    | rabbit  | #ab184164, Abcam                                                             | Western blotting                              | 1:1000                   |
| $\alpha$ -NUP153                                    | rabbit  | # HPA027897, Sigma-Aldrich                                                   | immunofluorescence                            | 1:100                    |
| $\alpha$ -GAPDH                                     | rabbit  | #10494-1-AP, Proteintech                                                     | Western blotting                              | 1:5000                   |
| $\alpha$ -Nup214                                    | rabbit  | Kehlenbach's lab                                                             | immunofluorescence                            | 1:100                    |
| $\alpha$ -VAPA                                      | rabbit  | #15275-1-AP, Proteintech                                                     | immunofluorescence                            | 1:200                    |
| $\alpha$ -mAB414                                    | mouse   | #MMS-120R, Covance                                                           | immunofluorescence                            | 1:500                    |
| $\alpha$ -SQSTM1                                    | rabbit  | #18420-1-AP, Proteintech                                                     | Western blotting<br>immunofluorescence<br>PLA | 1:1000<br>1:200<br>1:500 |
| $\alpha$ -TIA1                                      | mouse   | #sc-101267, Santacruz<br>Biotechnology                                       | Western blotting                              | 1:250                    |
| $\alpha$ -LAP2 $\beta$                              | rabbit  | #06-1002, Millipore                                                          | immunofluorescence                            | 1:100                    |
| $\alpha$ -ELYS                                      | rabbit  | # HPA031658, Sigma                                                           | immunofluorescence                            | 1:100                    |
| $\alpha$ -Nup358                                    | rabbit  | Melchior's lab                                                               | immunofluorescence                            | 1:50                     |
| $\alpha$ -FUS                                       | rabbit  | #HPA008784, Sigma                                                            | immunofluorescence                            | 1:100                    |
| $\alpha$ -TDP43                                     | rabbit  | #10782-2-AP, Proteintech                                                     | immunofluorescence                            | 1:500                    |
| $\alpha$ -LC3                                       | rabbit  | # PM036, MBL International                                                   | immunofluorescence                            | 1:100                    |
| $\alpha$ -LAMP1                                     | rabbit  | #L1418, Sigma                                                                | immunofluorescence                            | 1:100                    |
| $\alpha$ -HA                                        | mouse   | #MMS-101P_HA.11 Clone 16B12,<br>Covance                                      | immunofluorescence                            | 1:500                    |
| $\alpha$ -HA                                        | rabbit  | # 11867423001, Sigma                                                         | immunofluorescence                            | 1:500                    |
| $\alpha$ -Na <sup>+</sup> /K <sup>+</sup><br>ATPase | mouse   | #sc-21712, Santacruz Biotechnology                                           | Western blotting                              | 1:200                    |
| <b>Secondary antibodies</b>                         |         |                                                                              |                                               |                          |
| $\alpha$ -rabbit-HRP                                | donkey  | #711-035-152, Jackson<br>ImmunoResearch Laboratories, West<br>Grove, PA, USA | Western blotting                              | 1:5,000                  |
| $\alpha$ -rat-HRP                                   | goat    | #112-035-003, Jackson<br>ImmunoResearch Laboratories, West<br>Grove, PA, USA | Western blotting                              | 1:10,000                 |
| IRDye®<br>800CW $\alpha$ -<br>rabbit IgG (H +<br>L) | donkey  | LI-COR Biosciences                                                           | Western blotting                              | 1:10,000                 |
| IRDye®<br>800CW $\alpha$ -<br>mouse IgG (H +        | donkey  | LI-COR Biosciences                                                           | Western blotting                              | 1:10,000                 |

|                                  |        |                                    |                    |         |
|----------------------------------|--------|------------------------------------|--------------------|---------|
| L)                               |        |                                    |                    |         |
| $\alpha$ -rabbit-Alexa Fluor 488 | donkey | #A-21206, Molecular Probes, Eugene | immunofluorescence | 1:1,000 |
| $\alpha$ -mouse-Alexa Fluor 488  | donkey | #A-21202, Thermo Fisher Scientific | immunofluorescence | 1:600   |
| $\alpha$ -mouse-Alexa Fluor 594  | donkey | #A-21203, Thermo Fisher Scientific | immunofluorescence | 1:750   |
| $\alpha$ -rabbit-Alexa Fluor 594 | donkey | #A-21207, Thermo Fisher Scientific | immunofluorescence | 1:750   |
| $\alpha$ -rabbit-Alexa647        | donkey | #A-31573, Thermo Fisher Scientific | immunofluorescence | 1:500   |
